# Supplementary material
Source: PubMed Central journal article supplement (PMC304112)
Supplement: pnas_2335884100_1.pdf [file pnas_2335884100_1.pdf]

**Table 4. Primer sequences used for TaqMan experiments**

| <b>Primer</b>           | <b>Sequence (5' to 3')</b> |
|-------------------------|----------------------------|
| <b>Krh1-forward</b>     | GCACTGGCAGTGACAAGGAA       |
| <b>Krh1-reverse</b>     | CGTGGAGTGTTATCGTAAGTAGCAA  |
| <b>Utx-forward</b>      | GCGGGCAAAGCCTTTACC         |
| <b>Utx-reverse</b>      | AAATGCATCGTGAACTTTTCCA     |
| <b>Klu-forward</b>      | GCCGCCGGGACATGAT           |
| <b>Klu-reverse</b>      | CGTCTGAACGTCGGGAAATC       |
| <b>eIF S8 - forward</b> | TGAGTGTCTGCTATGGATTGCAA    |
| <b>eIF S8 - reverse</b> | TCGCGGCTCGTGGTAAA          |
| <b>rp49 - forward</b>   | GGAAGTGGAAAGTTTTAATGATGCA  |
| <b>rp49 - reverse</b>   | CAACAATGGATTTACGTTTTTTACTG |
