# Supplementary material
Source: PubMed Central journal article supplement (PMC304112)
Supplement: pnas_2335884100_2.pdf [file pnas_2335884100_2.pdf]

**Table 6. Transcription factors regulated by QMP**

| Closest <i>Drosophila</i> (or human) match | Similarity score | Days significantly regulated | Maximum fold difference | Nurse/Forager |
|--------------------------------------------|------------------|------------------------------|-------------------------|---------------|
| <i>Krh1</i>                                | 1.E-100          | 2,3,4↓                       | 0.59                    | Forager       |
| <i>UTX (human)</i>                         | 2.E-75           | 2,3↑                         | 1.45                    |               |
| <i>klumpfuss</i>                           | 4.E-25           | 2,3↓                         | 0.83                    |               |
| <i>HLHmgamma*</i>                          | 7.E-44           | 2↑, 3↓                       | 1.15, 0.83              | Forager       |
| <i>HLHmgamma*</i>                          | 3.E-22           | 3↓                           | 0.83                    | Forager       |
| <i>crp</i>                                 | 5.E-11           | 2↓                           | 0.88                    |               |
| <i>Hr46</i>                                | 3.E-73           | 2↓                           | 0.88                    | Forager       |
| <i>pros</i>                                | 7.E-13           | 2↓                           | 0.89                    |               |
| <i>Taf24</i>                               | 3.E-32           | 2↑                           | 1.12                    |               |
| <i>crol</i>                                | 9.E-132          | 3↓                           | 0.88                    |               |
| <i>gl</i>                                  | 2.E-08           | 3↓                           | 0.82                    |               |
| <i>Hcf</i>                                 | 6.E-95           | 3↓                           | 0.85                    |               |
| <i>Iswi</i>                                | 1.E-75           | 3↓                           | 0.83                    |               |
| <i>lola</i>                                | 1.E-09           | 3↓                           | 0.88                    |               |
| <i>stich1</i>                              | 1.E-07           | 3↓                           | 0.83                    | Forager       |
| <i>Taf110</i>                              | 2.E-36           | 3↓                           | 0.88                    | Forager       |
| <i>Tbp</i>                                 | 4.E-53           | 3↓                           | 0.86                    |               |

List of annotated transcription factors on the honey bee microarray that were significantly regulated by QMP on 1 or more days with changes in expression >10%. Genes marked with an asterisk were present in multiple copies on the microarray. ↓ denotes down-regulated on a particular days and ↑ denotes up-regulation. Transcription factors also found to be on the nurse or forager list (see Fig. 1) are noted.
