# Supplementary material
Source: PubMed Central journal article supplement (PMC304112)
Supplement: pnas_2335884100_4.pdf [file pnas_2335884100_4.pdf]

1 - - - - - M V G Y Y Q M K - - - - - Q I T N S T T M S V K N E I S T V E P V D P V K S L V C S P D L S - - - - - A. mellifera  
1 - - - - - L V S L G - G S - - - - - A L P G T Y T G P I S P A G D R G A S S S S P E Q S T Y H P V Q - - - - - A. gambiae  
1 M V Y Y S A N Q L L I K T E Q S S Q A Q F C L Q V P P P L T A T T T S V G L G V P P S G G Q Q E H F E L L Q T P Q Q R Q D. melanogaster

42 - - - - - V F T S P A C G S E T - - - - - P L T N - A. mellifera  
39 - - - - - S - - G G G G A S A T - - - - - P V G - - A. gambiae  
61 M Q L Q L Q D Q H Q Q E Q Q Q F V S Y Q L A I Q Q H Q K Q Q Q Q Q H E S I T N A A P T A A P S A Q R I K T E P V G G F D. melanogaster

57 - - - - - I E E K T Y Q C L L C Q K A F D Q K N L Y Q S H L R S H G K E - - - - - A. mellifera  
51 - - - - - S K F R C N Q C N I S F G S K S A H T S H M K S H A K Q Q Q A S E K L T A A A K L G E A. gambiae  
121 P A S A A V V S Q V R K P S A S K P Q F K C D Q C G M T F G S K S A H T S H T K S H S K N Q D L S L N G A S G A G V A A D. melanogaster

88 - - - - - G E - - - - - D P Y R C N I C G K T F A V P A R L T R H Y R T H T A. mellifera  
94 T T I T A S - - - G G S G G G T G S P A G P - - - - - Q P - - D P Y Q C D V C K K T F A V P A R L V R H Y R T H T A. gambiae  
181 P V S T A A I E L N D A G L P V G I P K S P T I K P L A N V A A G A D P Y Q C N V C Q K T F A V P A R L I R H Y R T H T D. melanogaster

116 G E K P Y Q C E Y C S K S F S V K E N L S V H R R I H T K E R P Y K C D V C E R A F E H S G K L H R H M R I H T G E R P A. mellifera  
141 G E R P F E C E F C H K M F S V K E N L Q V H R R I H T K E R P Y K C E I C G R A F E H S G K L H R H M R I H T G E R P A. gambiae  
241 G E R P F E C E F C H K L F S V K E N L Q V H R R I H T K E R P Y K C D V C G R A F E H S G K L H R H M R I H T G E R P D. melanogaster

176 H K C T V C S K T F I Q S G Q L V I H M R T H T G E K P Y V C K - - A C G K G F T C S K Q L K V H T R T H T G E K P Y T A. mellifera  
201 H K C N V C G K T F I Q S G Q L V I H M R T H T G E K P Y K C P V E G C G K G F T C S K Q L K V H S R T H T G E K P Y H A. gambiae  
301 H K C S V C E K T F I Q S G Q L V I H M R T H T G E K P Y K C P E P G C G K G F T C S K Q L K V H S R T H T G E K P Y H D. melanogaster

234 C D I C G K S F G Y N H V L K L H Q V A H Y G E K V Y K C T L C H E T F G S K K T M E L H I K T H S - - - - - D - - - - - A. mellifera  
261 C D I C F R D F G Y N H V L K L H R V Q H Y G A K C Y K C T I C D E T F K S K K E M E A H I K G H A N E L P D D - - E E A. gambiae  
361 C D I C F R D F G Y N H V L K L H R V Q H Y G S K C Y K C T I C D E T F K N K K E M E A H I K G H A N E V P D D E A E A D. melanogaster

285 - - S S V V G S P R D - - - - - S P - I E P E I E I S Q - - - - - N A. mellifera  
319 A A A A A A A S D A G - - - - - G A C K L E D V S T S G T E G S I K L S S S A L E G - - - - - G G - - - - - S G S N A. gambiae  
421 A A A S A A A S T S A G S S A G S P S L Q G V S S N S E S S N H S P P S S P P A T K K P R Q A R Q P R V S K T V A A T L D. melanogaster

306 S V S T G S - D K E N H K T E E P N D E V A T Y D N T P R D F P Y Y M Y S R E Q Y S Q S H L I S N E N R D F Q T T P T V A. mellifera  
362 S N S S S S F D Y S S S M S H T E G T E Q S G G P S S D E P S G H F A I R K S G S S S P S F A V G A N E A G Q Q R A Y G A. gambiae  
481 S I P T S S P L S P S S L S S T Y S P S A S S M A S P P P T S A H Y L P V Q M E A D A L S R D S G V S S A Q P A H S T Y D. melanogaster

365 S V E Q P H L F L Y P E V S S T Y T G - - - - - A. mellifera  
422 G G V A P A L L A A A S I A A A V E N G C T E V K Y C P - - - - - E L K Q Q R S - - - I S P V Q P S A L S I T R N T P P P A. gambiae  
541 A D E E P T D L S M Q Q V Q G Q L P E S T V D Y Y Q A P P S L L E L Q P Q P A G L T I N P A L L E A A S I A R R H D D N D. melanogaster

384 - F G I Q S T D F V G D C S S L L N L P - - G N D A R R R V E A A L E A V E E E R - - - - - A. mellifera  
475 S S G S S S S S S S S T S S V L S M T P S G G T S S T L L E P A G S S A P S G P S - - - - - A G - - - - - A. gambiae  
601 D D Q V Q D E D V H A A A W Q M M Q L C R G H G S L P P T E Q P A P S H Q P Q V P T L H V S D L A A N Y D D T H E A T V D. melanogaster

422 - - - - - Q R E Y G I R V E R D P I L T P P - - - - - S S N P V S P - A. mellifera  
519 - - - Q F V Y E P M A I M K H H G Y F A P A S Q I T E F R S S S D I V R Q V E A A I A G T E N L L T P P R S S P E S P D A. gambiae  
661 L I E H F K R G D L A R H G L H K G Y A P V P K Y E S A L P N P D V V R R V E A A I G - - - - - L R S S T E S P E D. melanogaster

446 - V P S P D P L D L A I P V R E T L I L P P R K R C K M I L E S M E I E R N G - L I A S - - - - - A. mellifera  
576 R S S S P E S D S V L M A D R D N N T L P P R K R K L Y F K D S Q H T V S A S P K M A S L E V T A P Q H Y G V T V V Q Q A. gambiae  
713 R S S S P E S D S L M M A D R N V M T L P L R K R K H Y M N K G D D G Q V D S - E K A S G D G T S A A G G A A S V G A G D. melanogaster

488 - - - - - Q R Q N S V I Q F A K A S . A. mellifera  
636 Q Q P P T P Q H H L Q Q Q P P L D A H S G H Q Q L F H P H Q K Q Q Q A. gambiae  
772 D G P G S K V M R M S S V I Q F A K A S D. melanogaster
